# Supplementary material for: European Headache Federation (EHF) critical reappraisal and meta-analysis of oral drugs in migraine prevention – part 3: topiramate
Source: PubMed Central journal article supplement (PMC10563338; doi:10.1186/s10194-023-01671-5), 2023-10-10
Supplement: 10194_2023_1671_MOESM2_ESM.pdf [file 10194_2023_1671_MOESM2_ESM.pdf]

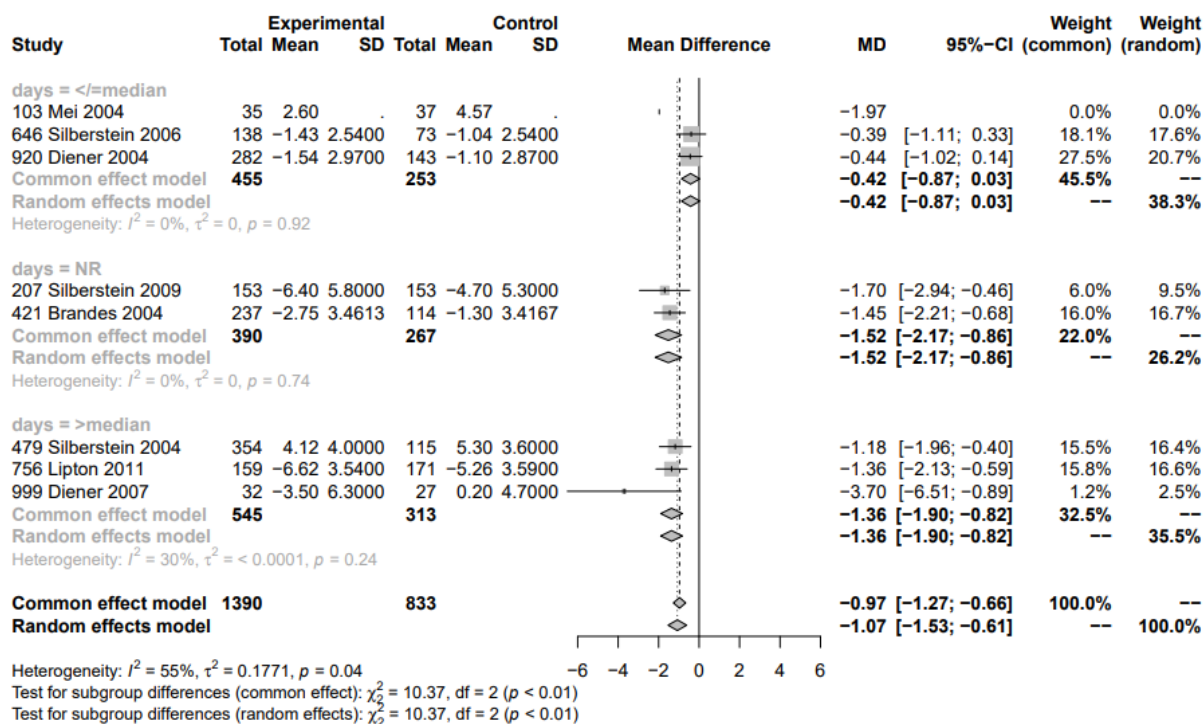

**Supplementary Material 2.1:** Subgroup analysis for the reduction in monthly migraine days based on the number of monthly migraine days at baseline (below vs. above the median value). NR = not reported.

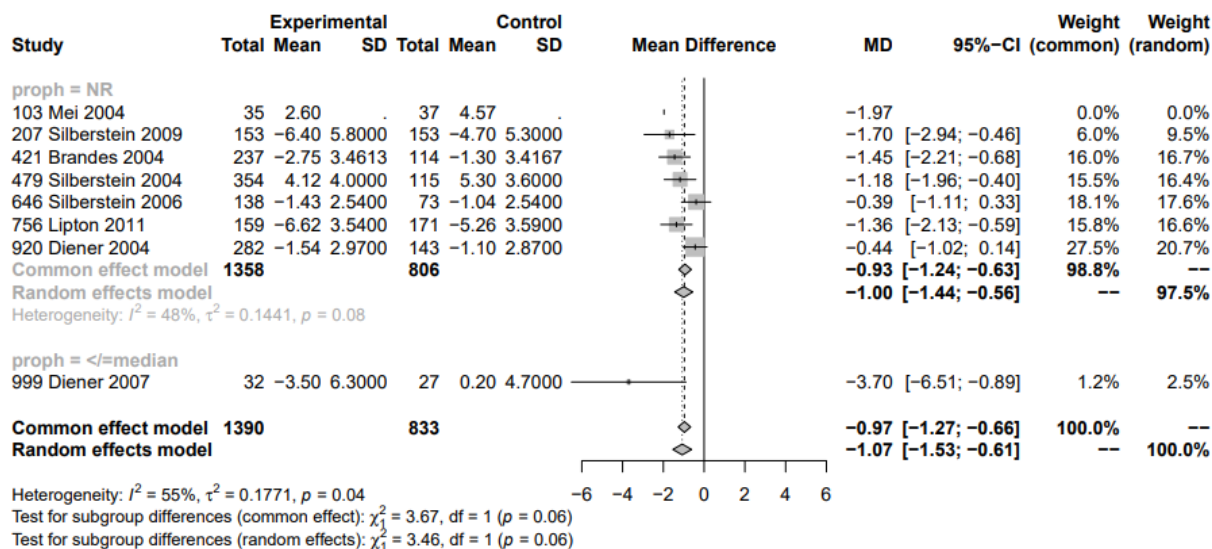

**Supplementary Material 2.2:** Subgroup analysis for the reduction in monthly migraine days based on the proportion of patients that had previously used prophylactic therapy (below vs. above the median value). NR = not reported.

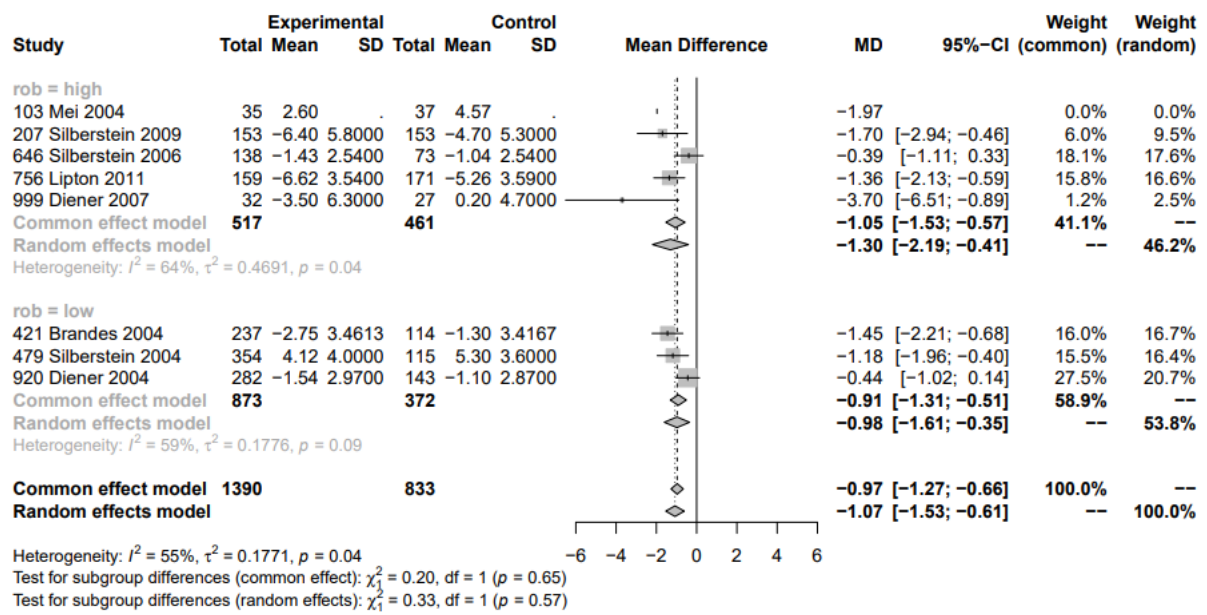

**Supplementary Material 2.3:** Subgroup analysis for the reduction in monthly migraine days based on the risk of bias (high vs. low). Rob = risk of bias.
